# Supplementary material
Source: PubMed Central journal article supplement (PMC7875249)
Supplement: NIHMS1662428-supplement-SM_Figs_S1-S3_Tables_S1-S3.pdf [file NIHMS1662428-supplement-SM_Figs_S1-S3_Tables_S1-S3.pdf]

## Supplementary Materials for

### **Different human resting memory CD4<sup>+</sup> T cell subsets show similar low inducibility of latent HIV-1 proviruses**

Kyungyoon J. Kwon, Andrew E. Timmons, Srna Sengupta, Francesco R. Simonetti, Hao Zhang, Rebecca Hoh, Steven G. Deeks, Janet D. Siliciano, Robert F. Siliciano\*

\*Corresponding author. Email: rsiliciano@jhmi.edu

Published 29 January 2020, *Sci. Transl. Med.* **12**, eaax6795 (2020)  
DOI: 10.1126/scitranslmed.aax6795

#### **The PDF file includes:**

Fig. S1. Representative flow cytometry plots of T cell subset phenotypes after stimulation.

Fig. S2. Results of the multiple stimulation viral outgrowth assay and intact proviral DNA assay (excluding data points below the limit of detection).

Fig. S3. Illustration of surface marker differences on resting versus activated CD4<sup>+</sup> T cell subsets.

Table S1. Characteristics of study participants.

Table S2. Frequencies of proviral copies, infection frequencies, and assay input cell numbers for samples below the limit of detection.

Table S3. Frequencies of proviral copies, infection frequencies, and inducibility indices for all T cell subsets from all 10 participants.

#### **Other Supplementary Material for this manuscript includes the following:**

(available at [stm.sciencemag.org/cgi/content/full/12/528/eaax6795/DC1](http://stm.sciencemag.org/cgi/content/full/12/528/eaax6795/DC1))

Data file S1 (Microsoft Excel format). Activation of T cell subsets in four representative participants.

Data file S2 (Microsoft Excel format). Average expression of CCR7 and CD27 for all T cell subsets from all participants.

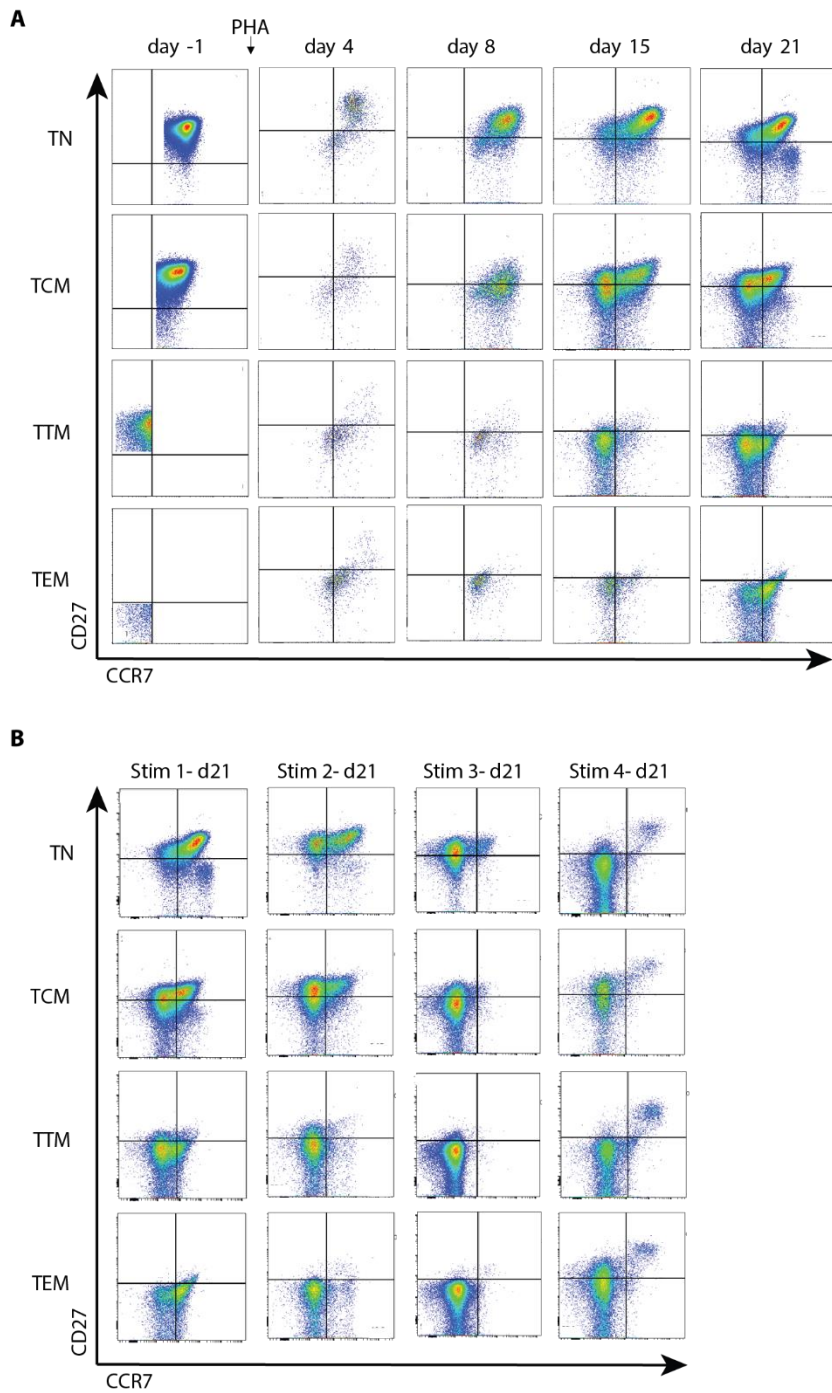

**Fig. S1. Representative flow cytometry plots of T cell subset phenotypes after stimulation. (A)** CCR7 and CD27 expression levels at time of sort and at 4, 8, 15, and 21 days after one stimulation from representative participant 2006. **(B)** CCR7 and CD27 expression levels 21 days after each respective stimulation from participant 2006.

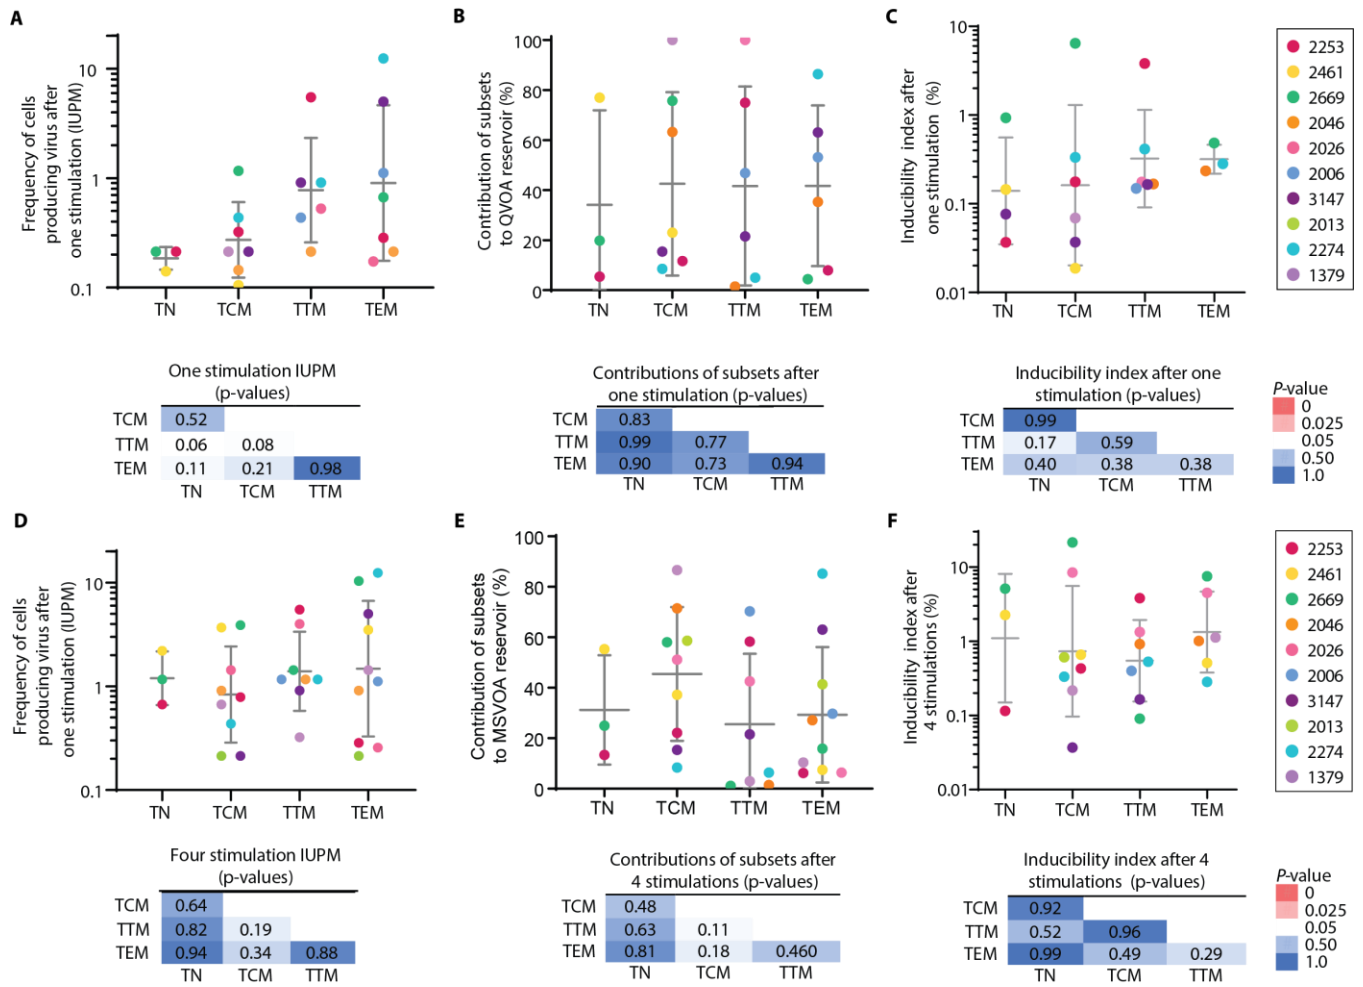

**Fig. S2. Results of the multiple stimulation viral outgrowth assay and intact proviral DNA assay (excluding data points below the limit of detection).** Data reanalyzed excluding samples where no intact proviruses were found (below limit of detection) or no viral outgrowth was observed. See Table S2 for raw data. Two-tailed *P*-values were calculated using Mann Whitney U-tests.

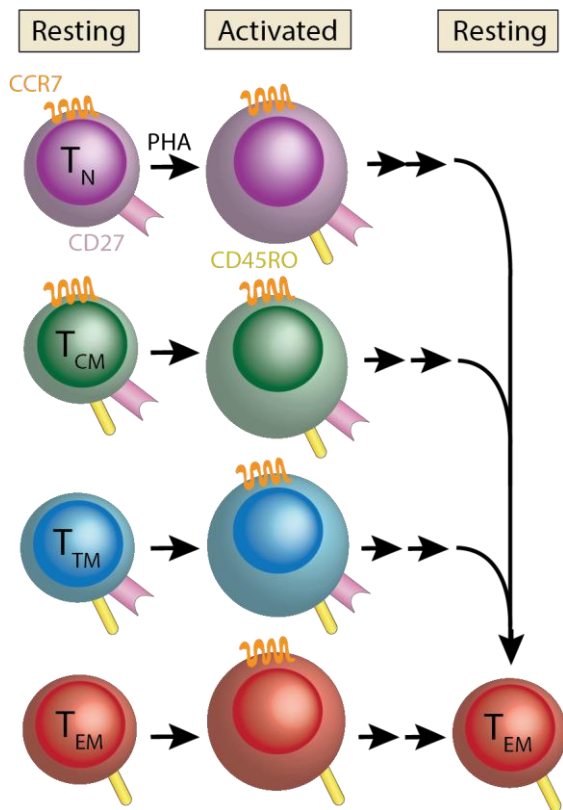

**Fig. S3. Illustration of surface marker differences on resting versus activated CD4<sup>+</sup> T cell subsets.** After activation with PHA, expression of the canonical subset-distinguishing surface markers changes. Naïve cells begin expressing CD45RO as they differentiate into memory cells. The initially resting subset cells differentiate toward the effector memory phenotype (CCR7<sup>-</sup>CD27<sup>-</sup>). TTM and TEM express CCR7 after activation. This highlights the importance of distinguishing resting vs total CD4<sup>+</sup> T cells which include activated cells. For example, the activated TTM cell exhibits the same surface markers as the activated TCM cell; even if they are functionally different, they would be sorted into the same population based on the canonical usage of CCR7 and CD27 to sort memory subsets.

**Table S1. Characteristics of study participants.**

| SCOPE ID | Age | Sex | Ethnicity        | Estimated minimum length of HIV infection at sample date (years) | Estimated minimum length of viral suppression at sample date (years) | CD4 Nadir (cells/ $\mu$ l) | CD4 count at sample date (cells/ $\mu$ l) | Viral Load at sample date (copies/ml) | ARV Regimen <sup>a</sup> |
|----------|-----|-----|------------------|------------------------------------------------------------------|----------------------------------------------------------------------|----------------------------|-------------------------------------------|---------------------------------------|--------------------------|
| 2253     | 67  | M   | White            | 18                                                               | 3.4 <sup>b</sup>                                                     | 376                        | 500                                       | <40                                   | ABC/TCV/3TC              |
| 2461     | 64  | M   | White            | 34                                                               | 18.7                                                                 | 408                        | 531                                       | <40                                   | RPV, TCV                 |
| 2669     | 59  | M   | White            | 28                                                               | 7.9 <sup>c</sup>                                                     | 180                        | 516                                       | <40                                   | ABC/TCV/3TC              |
| 2046     | 54  | M   | Pacific Islander | 26                                                               | 19.9                                                                 | 10                         | 456                                       | <40                                   | EGV/TAF/FTC/COBI         |
| 2026     | 64  | M   | White            | 30                                                               | 17.6                                                                 | 132                        | 377                                       | <40                                   | ABC/TCV/3TC              |
| 2006     | 68  | M   | White            | 23                                                               | 21.0                                                                 | 11                         | 428                                       | <40                                   | ABC/TCV/3TC              |
| 3147     | 62  | M   | Latino           | 25                                                               | 10.8 <sup>d</sup>                                                    | 4                          | 1089                                      | <40                                   | ABC/TCV/3TC              |
| 2013     | 70  | M   | White            | 32                                                               | 21.9                                                                 | 13                         | 588                                       | <40                                   | ABC/TCV/3TC              |
| 2274     | 57  | M   | White            | 16                                                               | 14.9                                                                 | 234                        | 383                                       | <40                                   | NVP, FTC/TAF             |
| 1379     | 50  | M   | African American | 13                                                               | 8.3                                                                  | 208                        | 612                                       | <40                                   | DRV, RTV, FTC/TDF        |

<sup>a</sup> ABC= abacavir, COBI= cobicistat, DRV= darunavir, EGV= elvitegravir, FTC=emtricitabine, NVP= nevirapine, RPV= rilpivirine, RTV= ritonavir, TAF= tenofovir alafenamide, TCV= dolutegravir, TDF= tenofovir disoproxil fumarate, 3TC= lamivudine

<sup>b</sup> Minimum length of viral suppression calculated after two non-consecutive blips of 68 c/mL (7/17/2014) and 217 c/mL (8/07/2014) were documented during an experimental study of PRO-140 monotherapy. Otherwise, fully suppressed on standard regimen since 8/16/2006.

<sup>c</sup> Per participant report, viral suppression maintained since 2000, but earliest available documented viral loads start in 2010. Estimated length of minimal viral suppression is based on documented viral loads.

<sup>d</sup> Minimum length of viral suppression calculated after isolated blip of 620 c/mL on 6/27/2007, otherwise suppressed since 8/20/2001.

**Table S2. Frequencies of proviral copies, infection frequencies, and assay input cell numbers for samples below the limit of detection.** Raw data for samples with no detected intact proviral copies by IPDA or no viral outgrowth seen after 4 stimulations (highlighted cells). Cell inputs for IPDA and MSVOA are shown.

| Participant ID | Subset | 3' del/hyp copies per million cells | 5' del copies per million cells | ICPM | QVOA IUPM | MSVOA IUPM | IPDA Total Cell Input | MSVOA Total Cell Input |
|----------------|--------|-------------------------------------|---------------------------------|------|-----------|------------|-----------------------|------------------------|
| 2253           | EM     | 1470                                | 5603                            | 0    | 0.29      | 0.29       | 1.8x10 <sup>4</sup>   | 7.2x10 <sup>6</sup>    |
| 2461           | TM     | 1250                                | 0                               | 0    | N/A       | N/A        | 1.5x10 <sup>3</sup>   | N/A                    |
| 2046           | N      | 14                                  | 0                               | 0    | 0.14      | 0.14       | 1.1x10 <sup>5</sup>   | 4.8x10 <sup>6</sup>    |
| 2046           | CM     | 492                                 | 2503                            | 0    | 0.14      | 0.91       | 1.5x10 <sup>4</sup>   | 4.8x10 <sup>6</sup>    |
| 2026           | N      | 181                                 | 399                             | 0    | 0.17      | 0.17       | 3.5x10 <sup>4</sup>   | 4.8x10 <sup>6</sup>    |
| 2006           | N      | 209                                 | 503                             | 0    | 0.14      | 0.14       | 5.2x10 <sup>4</sup>   | 4.8x10 <sup>6</sup>    |
| 2006           | CM     | 397                                 | 592                             | 111  | 0.14      | 0.14       | 3.1x10 <sup>4</sup>   | 4.8x10 <sup>6</sup>    |
| 2006           | EM     | 6469                                | 328                             | 0    | 1.12      | 1.12       | 1.8x10 <sup>4</sup>   | 2.0x10 <sup>6</sup>    |
| 3147           | N      | 218                                 | 322                             | 279  | 0.14      | 0.14       | 3.2x10 <sup>4</sup>   | 4.8x10 <sup>6</sup>    |
| 3147           | EM     | 1251                                | 1469                            | 0    | 5.00      | 5.00       | 7.5x10 <sup>4</sup>   | 8.0x10 <sup>6</sup>    |
| 2013           | N      | 88                                  | 436                             | 0    | 0.14      | 0.14       | 1.4x10 <sup>5</sup>   | 4.8x10 <sup>6</sup>    |
| 2013           | TM     | 513                                 | 82                              | 0    | 0.29      | 0.29       | 1.8x10 <sup>4</sup>   | 4.8x10 <sup>6</sup>    |
| 2013           | EM     | 363                                 | 187                             | 0    | 0.14      | 0.21       | 2.1x10 <sup>5</sup>   | 2.4x10 <sup>6</sup>    |
| 2274           | N      | 88                                  | 0                               | 0    | 0.14      | 0.14       | 4.3x10 <sup>4</sup>   | 4.8x10 <sup>6</sup>    |
| 1379           | N      | 272                                 | 272                             | 200  | 0.14      | 0.14       | 3.3x10 <sup>4</sup>   | 4.8x10 <sup>6</sup>    |
| 1379           | TM     | 4985                                | 7315                            | 0    | 0.22      | 0.32       | 2.8x10 <sup>4</sup>   | 3.2x10 <sup>6</sup>    |

**Table S3. Frequencies of proviral copies, infection frequencies, and inducibility indices for all T cell subsets from all 10 participants.** For samples where no proviral copies were detected, the LOD (4 copies/10<sup>6</sup> cells) was used in calculations.

| Patient | Subset | Subset Frequency in Peripheral Blood (%) | 3' del/hyp copies per million cells | 5' del copies per million cells | ICPM | QVOA IUPM | MSVOA IUPM |  |
|---------|--------|------------------------------------------|-------------------------------------|---------------------------------|------|-----------|------------|--|
| 2253    | N      | 24.9                                     | 4699                                | 7068                            | 852  | 0.21      | 0.67       |  |
|         | CM     | 34.9                                     | 5452                                | 7139                            | 269  | 0.32      | 0.79       |  |
|         | TM     | 13.2                                     | 2796                                | 2817                            | 212  | 5.49      | 5.49       |  |
|         | EM     | 27.0                                     | 1470                                | 5603                            | 0    | 0.29      | 0.29       |  |
| 2461    | N      | 67.2                                     | 280                                 | 424                             | 143  | 0.14      | 2.20       |  |
|         | CM     | 26.9                                     | 1575                                | 901                             | 824  | 0.11      | 3.70       |  |
|         | TM     | 0.2                                      | 1250                                | 0                               | 0    | N/A       | N/A        |  |
|         | EM     | 5.7                                      | 62                                  | 138                             | 1008 | 0.29      | 3.50       |  |
| 2669    | N      | 56.0                                     | 635                                 | 412                             | 34   | 0.21      | 1.17       |  |
|         | CM     | 39.0                                     | 26                                  | 50                              | 27   | 1.17      | 3.90       |  |
|         | TM     | 2.0                                      | 19235                               | 6602                            | 2342 | 0.87      | 1.44       |  |
|         | EM     | 4.0                                      | 3848                                | 18419                           | 203  | 0.67      | 10.40      |  |
| 2046    | N      | 75.4                                     | 14                                  | 0                               | 0    | 0.14      | 0.14       |  |
|         | CM     | 17.6                                     | 492                                 | 2503                            | 0    | 0.14      | 0.91       |  |
|         | TM     | 0.3                                      | 884                                 | 610                             | 188  | 0.21      | 1.17       |  |
|         | EM     | 6.7                                      | 821                                 | 3538                            | 133  | 0.21      | 0.91       |  |
| 2026    | N      | 40.0                                     | 181                                 | 399                             | 0    | 0.17      | 0.17       |  |
|         | CM     | 30.0                                     | 65                                  | 94                              | 25   | 0.14      | 1.44       |  |
|         | TM     | 9.0                                      | 2539                                | 2513                            | 441  | 0.53      | 3.99       |  |
|         | EM     | 21.0                                     | 10                                  | 123                             | 8    | 0.17      | 0.26       |  |
| 2006    | N      | 41.3                                     | 209                                 | 503                             | 0    | 0.14      | 0.14       |  |
|         | CM     | 48.2                                     | 397                                 | 592                             | 111  | 0.14      | 0.14       |  |
|         | TM     | 7.3                                      | 1957                                | 1243                            | 430  | 0.44      | 1.17       |  |
|         | EM     | 3.2                                      | 6469                                | 328                             | 0    | 1.12      | 1.12       |  |
| 3147    | N      | 43.5                                     | 218                                 | 322                             | 279  | 0.14      | 0.14       |  |
|         | CM     | 37.7                                     | 4851                                | 7804                            | 848  | 0.21      | 0.21       |  |
|         | TM     | 12.3                                     | 7651                                | 20722                           | 814  | 0.91      | 0.91       |  |
|         | EM     | 6.6                                      | 1251                                | 1469                            | 0    | 5.00      | 5.00       |  |
| 2013    | N      | 60.4                                     | 88                                  | 436                             | 0    | 0.14      | 0.14       |  |
|         | CM     | 21.0                                     | 255                                 | 2110                            | 52   | 0.14      | 0.21       |  |
|         | TM     | 3.9                                      | 513                                 | 82                              | 0    | 0.29      | 0.29       |  |
|         | EM     | 14.8                                     | 363                                 | 187                             | 0    | 0.14      | 0.21       |  |
| 2274    | N      | 24.4                                     | 88                                  | 0                               | 0    | 0.14      | 0.14       |  |
|         | CM     | 46.2                                     | 1552                                | 1901                            | 192  | 0.44      | 0.44       |  |
|         | TM     | 13.0                                     | 3803                                | 3486                            | 324  | 0.91      | 1.17       |  |
|         | EM     | 16.4                                     | 2621                                | 2156                            | 6461 | 12.42     | 12.42      |  |
| 1379    | N      | 45.4                                     | 272                                 | 272                             | 200  | 0.14      | 0.14       |  |
|         | CM     | 48.5                                     | 4113                                | 5229                            | 453  | 0.21      | 0.67       |  |
|         | TM     | 3.5                                      | 4985                                | 7315                            | 0    | 0.22      | 0.32       |  |
|         | EM     | 2.7                                      | 4013                                | 10897                           | 188  | 0.29      | 1.44       |  |
| HD1     | N      | 38.5                                     | N/A                                 |                                 |      |           |            |  |
|         | CM     | 40.7                                     |                                     |                                 |      |           |            |  |
|         | TM     | 7.2                                      |                                     |                                 |      |           |            |  |
|         | EM     | 13.6                                     |                                     |                                 |      |           |            |  |
